# Supplementary material
Source: publisher figshare collection journal article supplement (https://gsajournals.figshare.com/ndownloader/files/18044765)
Supplement: Supplementary file 1 [file 18044765]

## Sheet: Sheet1
Contig	Left Mapping Position	Right Mapping Position
RWKB01000085.1	18485342	18996995
RWKB01000054.1	19018992	20342199
RWKB01000007.1	20236120	26748555
RWKB01000019.1	26749504	31485672
RWKB01000024.1	31513969	35229474
RWKB01000082.1	41703171	42375034
RWKB01000092.1	42393888	42517941
